# Supplementary material for: Lower Diagnostic Costs Associated with Early Deployment of Capsule Endoscopy in Non-Hematemesis Gastrointestinal Bleeding: a Cost-Utilization Analysis
Source: Research Square preprint supplement (doi:10.21203/rs.3.rs-41552/v2), 2020-11-03
Supplement: Supplementary file 1 [file c23ce0250d570995a8bb6774.docx]

**Figure 1**: Disposition of Patients Presenting to the Emergency Department for Non-Hematemesis GIB

**Figure 2**: Diagnostic Probabilities and Overall Incurred Costs of Primary Diagnostic Procedures Performed in NHGIB Patients Admitted to the Floor

**Figure 3:** Overall Costs and Decision Flow of Primary EGDs in NHGIB Patients Admitted to the Floor

**Figure 4**: Overall Costs and Decision Flow of Primary COLOs in NHGIB Patients Admitted to the Floor

**Figure 5**: Overall Costs and Decision Flow of Primary VCE in NHGIB Patients Admitted to the Floor

**Figure 6**: Overall Incurred Diagnostic Times of Primary Diagnostic Procedures Performed in NHGIB Patients Admitted to the Floor

**Figure 7**: Expected Costs of Choosing a Primary VCE with Variation in Probability of VCE being + for Patients Admitted to the Floor

**Supplement Figure 1**: Diagnostic Probabilities and Overall Incurred Costs of Primary Diagnostic Procedures Performed in NHGIB Patients Admitted to the ICU

**Supplement Figure 2**: Overall Costs and Decision Flow of Primary EGDs in NHGIB Patients Admitted to the ICU

**Supplement Figure 3**: Overall Costs and Decision Flow of Primary COLOs in NHGIB Patients Admitted to the ICU

**Supplement Figure 4**: Overall Costs and Decision Flow of Primary VCE in NHGIB Patients Admitted to the ICU

**Supplement Figure 5**: Overall Incurred Diagnostic Times of Primary Diagnostic Procedures Performed in NHGIB Patients Admitted to the ICU

**Supplement Figure 6**: Expected Incurred Diagnostic Hours for Choosing a Primary EGD with Variation in Probability of EGD being + for Patients Admitted to the Floor

**Supplement Figure 7**: Expected Incurred Diagnostic Hours for Choosing a Primary COLO with Variation in Probability of COLO being + for Patients Admitted to the Floor

**Supplement Figure 8**: Expected Incurred Diagnostic Hours for Choosing a Primary VCE with Variation in Probability of VCE being + for Patients Admitted to the Floor

**Supplement Figure 9**: Expected Costs of Choosing a Primary EGD with Variation in Probability of EGD being + for Patients Admitted to the Floor

**Supplement Figure 10**: Expected Costs of Choosing a Primary COLO with Variation in Probability of COLO being + for Patients Admitted to the Floor
